# Supplementary material
Source: Springer Nature journal article supplement (https://www.springermedizin.de/resource/supplementary/12913_2013_3397_MOESM1_ESM.pdf/9532720)

**a**

Before

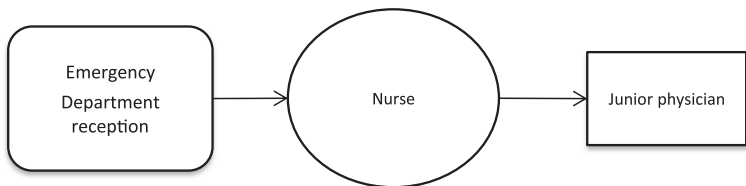

After

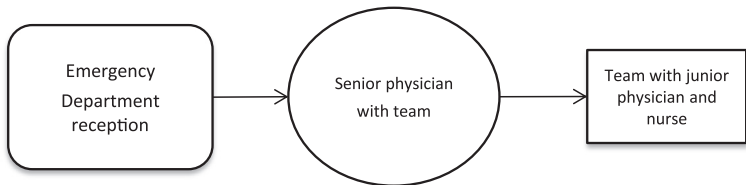**b**

Before

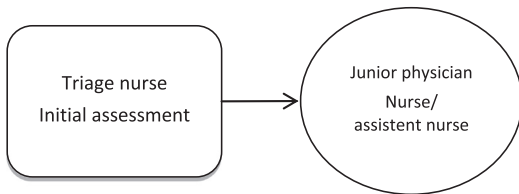

After

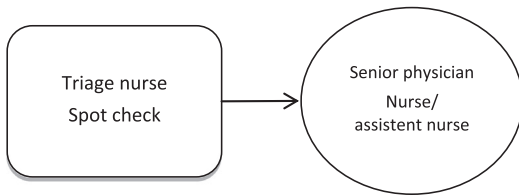

Supplement: MOESM1 [file 9532720]
